# Supplementary material
Source: publisher site journal article supplement (https://www.degruyterbrill.com/publication/isbn/9783110314915/downloadAsset/9783110314915_Inhaltsverzeichnis.pdf)
Supplement: Supplementary file 1 [file 9783110314915_Inhaltsverzeichnis.pdf]

# Inhalt

**Vorwort — VII**

**Abkürzungsverzeichnis — XII**

**Abbildungsverzeichnis — XIII**

**Tabellenverzeichnis — XVII**

**1 Inhalt und Struktur — 1**

**2 Besitzwechselverben aus kognitiv-semantischer Perspektive — 6**

2.1 Einleitendes — 6

2.2 Besitzwechselverben aus der Perspektive der Frame-Semantik — 9

2.3 Zur lexikalischen Dekomposition von Besitzwechselverben — 27

2.4 *Kriegen* und *bekommen* als Basisverben des Deutschen — 37

2.5 Zusammenfassung — 44

**3 Variationslinguistische Analysen — 46**

3.1 Einleitendes — 46

3.2 Übersicht zu Korpora und Datenbeständen — 47

3.3 Zur Syntax und Semantik von *kriegen* in den Varietäten des Deutschen — 57

3.3.1 *Kriegen*-Typen im Gegenwartsdeutschen (Klassifikation) — 57

3.3.2 *Kriegen* in den Dialekten des Deutschen — 93

3.3.2.1 Analyse von Dialektwörterbüchern — 93

3.3.2.2 Analyse von Zwirner-Aufnahmen — 139

3.3.2.3 Zusammenfassung — 159

3.3.3 *Kriegen* in den Regiolekten des Deutschen — 166

3.3.3.1 Analyse des Pfeffer-Korpus — 166

3.3.3.2 Analyse von Regiolektatlanten — 174

3.3.3.3 Zusammenfassung — 181

3.3.4 *Kriegen* im geschriebenen Deutsch — 185

3.3.4.1 Analyse von Chat-Daten — 185

3.3.4.2 Analyse von Zeitungstexten — 195

3.3.4.3 Zusammenfassung — 211

3.3.5 Horizontal-vertikale Distribution der *kriegen*-Typen im Gegenwartsdeutschen (Zusammenfassung) — 217

|          |                                                                                                             |
|----------|-------------------------------------------------------------------------------------------------------------|
| 3.4      | Zur Syntax und Semantik von <i>bekommen</i> in den Varietäten des Deutschen — 223                           |
| 3.4.1    | <i>Bekommen</i> -Typen im Gegenwartsdeutschen (Klassifikation) — 223                                        |
| 3.4.2    | <i>Bekommen</i> in den Dialekten des Deutschen — 244                                                        |
| 3.4.2.1  | Analyse von Dialektwörterbüchern — 244                                                                      |
| 3.4.2.2  | Analyse von Zwirner-Aufnahmen — 253                                                                         |
| 3.4.2.3  | Zusammenfassung — 257                                                                                       |
| 3.4.3    | <i>Bekommen</i> in den Regiolekten des Deutschen — 261                                                      |
| 3.4.3.1  | Analyse des Pfeffer-Korpus — 261                                                                            |
| 3.4.3.2  | Analyse von Regiolektatlanten — 265                                                                         |
| 3.4.3.3  | Zusammenfassung — 270                                                                                       |
| 3.4.4    | <i>Bekommen</i> im geschriebenen Deutsch — 275                                                              |
| 3.4.4.1  | Analyse von Chat-Daten — 275                                                                                |
| 3.4.4.2  | Analyse von Zeitungstexten — 284                                                                            |
| 3.4.4.3  | Zusammenfassung — 291                                                                                       |
| 3.4.5    | Horizontal-vertikale Distribution der <i>bekommen</i> -Typen im Gegenwartsdeutschen (Zusammenfassung) — 296 |
| <b>4</b> | <b>Sprachgeschichtliche Analysen — 299</b>                                                                  |
| 4.1      | Einleitendes — 299                                                                                          |
| 4.2      | Übersicht zu Korpora und Datenbeständen — 301                                                               |
| 4.3      | Zur Panchronie von <i>kriegen</i> — 303                                                                     |
| 4.3.1    | Zum Forschungsstand — 303                                                                                   |
| 4.3.2    | Analyse historischer Korpora — 315                                                                          |
| 4.3.3    | Panchronische Pfade von <i>kriegen</i> (Übersicht) — 340                                                    |
| 4.4      | Zur Panchronie von <i>bekommen</i> — 366                                                                    |
| 4.4.1    | Zum Forschungsstand — 366                                                                                   |
| 4.4.2    | Analyse historischer Korpora — 371                                                                          |
| 4.4.3    | Panchronische Pfade von <i>bekommen</i> (Übersicht) — 389                                                   |
| <b>5</b> | <b>Zur Konkurrenz von <i>kriegen</i>, <i>bekommen</i> und anderen Besitzwechselverben — 403</b>             |
| 5.1      | Einleitendes — 403                                                                                          |
| 5.2      | Standardsprachorientierte Perspektiven — 403                                                                |
| 5.3      | Sprachgeschichtliche Befunde — 417                                                                          |
| 5.4      | <i>Kriegen</i> und <i>bekommen</i> im Gegenwartsdeutschen — 427                                             |
| 5.4.1    | Potentielle Konkurrenzkontexte (Übersicht) — 427                                                            |
| 5.4.2    | Dialektale Befunde — 431                                                                                    |

- 5.4.3      Regiolektale Befunde — 439
- 5.4.4      Schriftsprachliche Befunde — 454

**6          Zusammenfassung und Ausblick — 472**

**Literaturverzeichnis — 482**

**Verzeichnis der Korpora und Datenquellen — 504**
